# Supplementary material for: Mobile Application-Based Support for Periodontal Treatment Improves Clinical, Cognitive, and Psychomotor Outcomes: A Randomized Controlled Trial Study
Source: MDPI journal article supplement (doi:10.3390/dj12030063), 2024-03-04
Supplement: s1 [file s1]

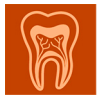

**Cognitive Measuring Instrument (pre-test and post-test questions) in Indonesia (English)**

1. Ciri – ciri gusi yang sehat adalah (Sign of a healthy gums) ...
  - a. Gusi terlihat membesar (Swelling)
  - b. Gusi mengeluarkan nanah (Pus comes out)
  - c. Gusi berwarna merah muda (Pink coral in color)
2. Yang merupakan gejala penyakit gusi adalah (Below are signs of gums disease) ...
  - a. Gusi mudah berdarah (Easy to bleed)
  - b. Gusi bengkak (Swelling)
  - c. Gusi mengerut/turun (Gum recession)
  - d. Semua benar (All is correct)
3. Gusi dapat mengalami perubahan warna apabila sering (Gum discoloration might be due to) ...
  - a. Merokok (Smoking)
  - b. Mengunyah sirih (Betel nut chewing)
  - c. Minum kopi (Coffee)
4. Penyebab terjadinya gusi bengkak dan mudah berdarah adalah (The etiology of gingival swelling and bleeding)...
  - a. Penumpukan plak pada gigi (Dental plaque accumulation)
  - b. Pasta gigi yang salah (Toothpaste misuse)
  - c. Makan permen (Candies)
5. Yang bukan termasuk salah satu faktor risiko di dalam rongga mulut yang dapat memperberat penyakit gusi ialah (Things that are not a risk factor for gum disease)...
  - a. Karang gigi (Dental calculus)
  - b. Tambalan gigi yang masih baik (Proper dental restoration)
  - c. Gigi berjejal (Malposition of teeth)
6. Penyakit sistemik yang sering menyebabkan kegoyangan pada gigi adalah (Systemic disease that may contribute to tooth mobility)...
  - a. Tipus (Typhoid)
  - b. Hipertensi (Hypertension)
  - c. Diabetes/penyakit gula (Diabetes Mellitus)
7. Penyakit gusi dapat menjadi semakin parah jika memiliki kebiasaan (Gum disease can be worse due to) ...
  - a. Makan makanan manis (Sweets)
  - b. Minum soda (Soda)
  - c. Merokok (Smoking)
8. Kapan Anda memeriksakan gigi secara rutin ke dokter gigi (Time for you to visit a dentist)?
  - a. Minimal 6 bulan sekali (At least once in 6 months)
  - b. Lebih dari 1 tahun sekali (Once in more than 1 year)
  - c. Lebih dari 2 tahun sekali (Once in more than 2 years)
9. Cara yang paling utama dan mudah dilakukan oleh diri sendiri dalam rangka memelihara kesehatan gigi yaitu (Things that can be done individually and improve the oral health)...
  - a. Memakai tusuk gigi (toothpick usage)
  - b. Menggunakan benang gigi (dental floss usage)
  - c. Menyikat gigi 2 kali sehari (Toothbrushing twice a day)
10. Berapa lama sebaiknya total waktu yang dihabiskan saat menyikat gigi (Duration for toothbrushing)?
  - a. 30 detik (30 seconds)
  - b. 1 menit (1 minute)
  - c. 2 menit (2 minutes)
11. Pasien dapat membersihkan plak gigi dengan (Patient can clean dental plaque by) ...
  - a. Berkumur kencang (hard gargling)
  - b. Menyikat gigi (tooth brushing)
  - c. Menggunakan tusuk gigi (toothpick usage)

- 
12. Pembersihan karang gigi oleh tenaga medis disebut (Cleaning of the calculus is)...
- a. Desensitasi gigi (Desentization)
  - b. Scaling (Scaling)
  - c. tambal gigi (Dental filling)
13. Manfaat menggunakan benang gigi adalah (The propose of dental floss)...
- a. Mengeluarkan makanan yang terselip (Clean the impacted food)
  - b. Membersihkan gigi pada area yang tidak tercakup oleh sikat gigi (Clean the area that is missed by conventional toothbrushing)
  - c. Membersihkan daerah sela gigi (Clean the interdental area)
  - d. Semua benar (All is correct)
14. Bulu sikat gigi yang baik digunakan adalah (The ideal type of bristle)...
- a. Lembut (Soft)
  - b. Keras (Hard)
  - c. Kasar (Rough)
15. Salah satu cara mengurangi resiko bau mulut adalah dengan cara (Things to be done to reduce oral malodor) ...
- a. Menggunakan tusuk gigi (Toothpick)
  - b. Membersihkan lidah dengan alat *tongue scrapper* (Clean the tongue with tongue scrapper)
  - c. Minum teh manis (Sweet iced tea)

Table S1. Psychomotor Measuring Instrument (checklist of oral hygiene procedures)

| No | KEGIATAN (ACTIVITY)                                                                                                                                                                                                                                                                                                                                                                                                                                                                             | DILAKUKAN (PERFORMED) | TIDAK DILAKUKAN (NOT PERFORMED) |
|----|-------------------------------------------------------------------------------------------------------------------------------------------------------------------------------------------------------------------------------------------------------------------------------------------------------------------------------------------------------------------------------------------------------------------------------------------------------------------------------------------------|-----------------------|---------------------------------|
| 1. | Jumlah pasta gigi yang dikeluarkan dan diberikan pada permukaan sikat gigi terlihat cukup, tidak berlebihan atau kurang, sebanyak setengah dari bulu sikat<br>(The amount of toothpaste given to the toothbrush is enough, not excessive, and not less, more than half of the bristle)                                                                                                                                                                                                          |                       |                                 |
| 2. | Menggunakan cermin sebagai alat bantu evaluasi selama proses menyikat gigi<br>(Using the mirror as a tool to evaluate the process of dental cleaning)                                                                                                                                                                                                                                                                                                                                           |                       |                                 |
| 3. | Menggunakan salah satu dari teknik penyikatan gigi dengan benar (teknik sulkular: <i>bass intrasulcular technique</i> , <i>modified bass technique</i> ; teknik sirkular/ <i>scrub</i> : <i>fonex technique</i> ; teknik vertikal: <i>roll technique</i> )<br>(Using one of the following techniques for tooth brushing (Sulcular technique: <i>bass intrasulcular technique</i> , <i>modified bass technique</i> ; scrub: <i>fonex technique</i> ; vertical technique: <i>roll technique</i> ) |                       |                                 |
| 4. | Penyikatan dilakukan pada semua permukaan gigi<br>(All dental surface is cleaned)                                                                                                                                                                                                                                                                                                                                                                                                               |                       |                                 |
| 5. | Per-sextant dilakukan sejumlah kali gerakan menyikat sesuai dengan teknik yang digunakan<br>(Tooth brushing is performed using a proper technique and done several times)                                                                                                                                                                                                                                                                                                                       |                       |                                 |
| 6. | Cara memegang tangkai sikat gigi yang benar dan tekanan ringan<br>(Proper hand grip to use the toothbrush and gentle pressure)                                                                                                                                                                                                                                                                                                                                                                  |                       |                                 |
| 7. | Total waktu penyikatan gigi yang dibutuhkan 1.5 – 2.5 menit<br>(The duration for toothbrushing is 1.5-2.5 mins)                                                                                                                                                                                                                                                                                                                                                                                 |                       |                                 |
| 8. | Menggunakan alat bantu yang disediakan peneliti ( <i>tongue scraper</i> , <i>dental floss</i> , <i>interdental brush</i> )<br>(Interdental aids usage ( <i>tongue scraper</i> , <i>dental floss</i> , <i>interdental brush</i> ))                                                                                                                                                                                                                                                               |                       |                                 |
| 9. | Evaluasi hasil penyikatan gigi dilihat dengan cermin<br>(Mirror is used to evaluate the result of toothbrushing)                                                                                                                                                                                                                                                                                                                                                                                |                       |                                 |
|    | Jumlah (Total score)                                                                                                                                                                                                                                                                                                                                                                                                                                                                            |                       |                                 |
